# Supplementary material
Source: Springer Nature journal article supplement (http://www.springermedizin.de/resource/supplementary/12904_2011_113_MOESM1_ESM.pdf/9517538)

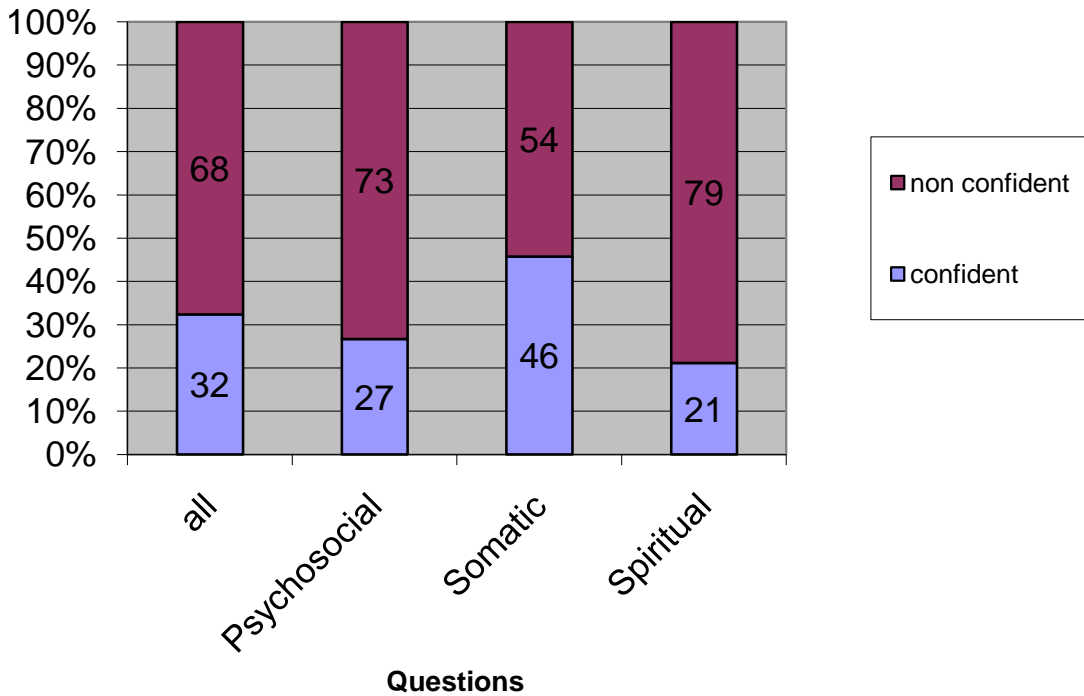

Supplement: MOESM1 [file 9517538]
